# Supplementary material for: Kinetic and multidimensional profiling of accelerated degradation of oil sludge by biostimulation
Source: Royal Society of Chemistry journal article supplement (doi:10.1039/c4em00428k), 2015-01-01
Supplement: c4em00428k1.pdf [file c4em00428k1.pdf]

## Electronic Supporting Information:

Table S1 Characteristics of surveyed oil sludge

| Properties | Soil texture |        |       |      |      | Salt<br>/g.kg <sup>-1</sup> | Total<br>Nitrogen<br>/g.kg <sup>-1</sup> | Organi<br>c /g.kg <sup>-1</sup> | Conductivity<br>/mS.cm <sup>-1</sup> | pH*  |
|------------|--------------|--------|-------|------|------|-----------------------------|------------------------------------------|---------------------------------|--------------------------------------|------|
|            | Gravel       | Coarse | Fine  | Silt | Clay |                             |                                          |                                 |                                      |      |
|            | /%           | sand   | sand  | /%   | /%   |                             |                                          |                                 |                                      |      |
|            |              | grains | /%    |      |      |                             |                                          |                                 |                                      |      |
| Values     | 2.08         | 58.91  | 15.62 | 11.7 | 5.49 | 19.6                        | 1.05                                     | 131                             | 5.67                                 | 8.13 |
|            |              |        |       |      | 5    |                             |                                          |                                 |                                      |      |

\* The mass ratio between water and soil is 5:1

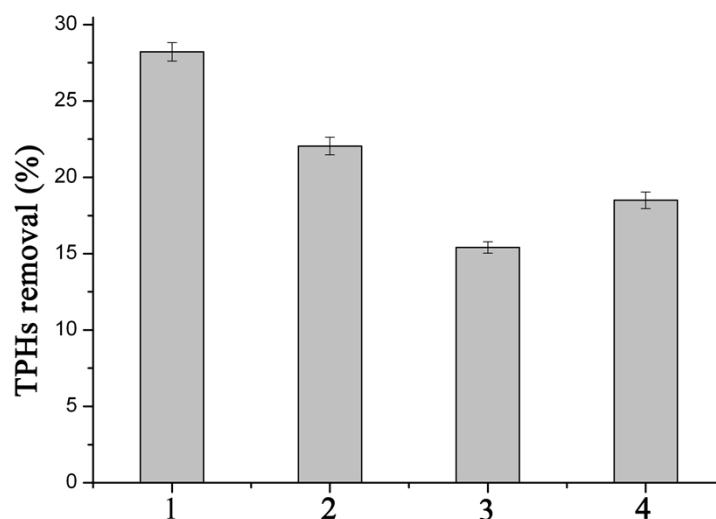

Figure S1. The effect of ratio of C:N:P on removal yield of TPH.

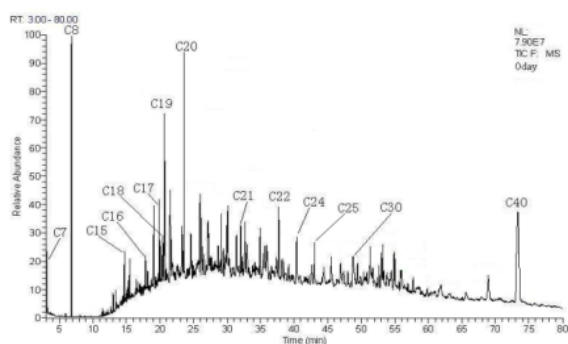

(a) 0 day

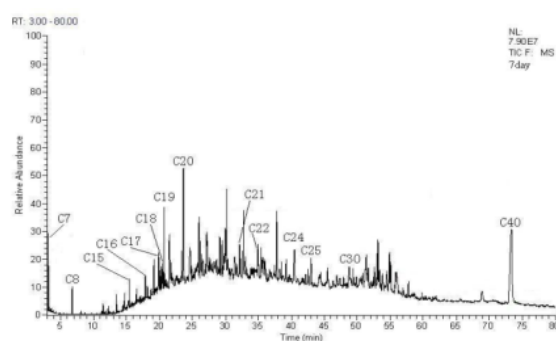

(b) 7 day

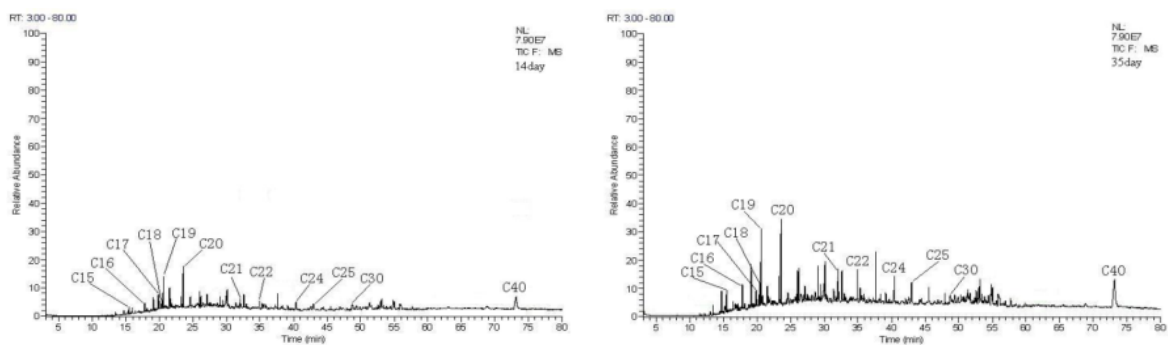

(c) 14 day

(d) 35 day

Figure S2. GC-MS analysis of the Saturates during biostimulation (Case E)

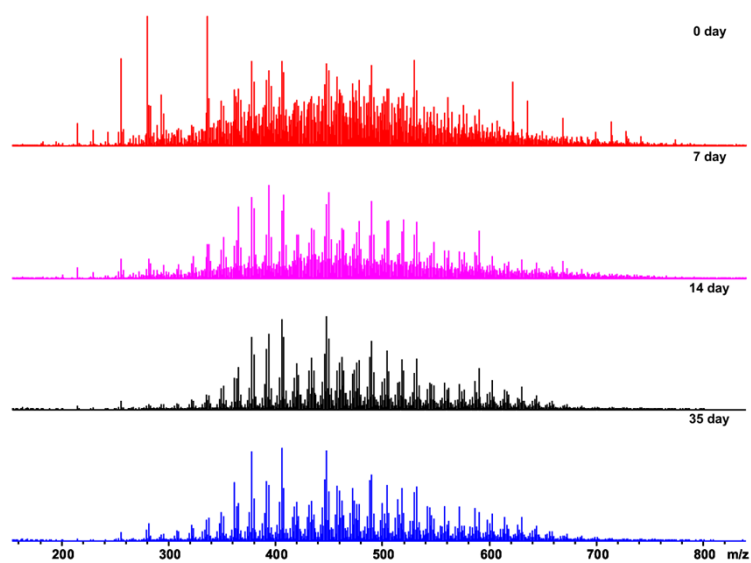

Figure S3. Negative-ion ESI FT-ICR mass spectrum of oil sludge before and after treatment of biostimulation (Case E)
